# Supplementary material
Source: Elsevier journal article supplement (https://www.sciencedirect.com/science/article/pii/S2173507717300303)
Supplement: mmc1 [file S2173507717300303:mmc1.docx]

**Apéndice técnico.**

**Cálculo del tamaño muestral**

El número total de casos de cáncer colorectal (CCR) en los años 2010 a 2013 fue de 1228. Al no disponer de información acerca de la desviación típica del coste del paciente por año, se tomó la media descrita en la literatura que fue de 16034 € [1]. Asumiendo un coeficiente de variación del 75% se estimó una desviación típica de 12025 €. Para una precisión de entre 750 € y 800 € y con un nivel de confianza del 95% el cálculo del tamaño muestra determinó una muestra entre 548 y 509 casos cuyo tamaño finalmente resultó ser de 529.

Referencia

1. López Bastida J, Sassi F, Bellas Beceiro B, García Pérez, L. Análisis coste-efectividad del cribado del cáncer colorrectal en la población general. Madrid: Plan de Calidad para el SNS del MSC. Servicio de Evaluación del Servicio Canario de la Salud; 2010. Informes de Evaluación de Tecnologías Sanitarias: SESCS Nº 2006/23.

**Cálculo de los costes unitarios de hospitalización quirúrgica**

El sistema de contabilidad analítica del Servicio Vasco de Salud utiliza la imputación de los costes de los servicios estructurales e intermedios para obtener el coste final del servicio de hospitalización correspondiente. En nuestro caso se analizaron los costes de cirugía y oncología. Posteriormente se convierte la actividad de hospitalización de cada servicio en pesos (GRD) Grupos Relacionados con el Diagnóstico mediante el software de clasificación. Una vez ponderada y sumada la actividad en pesos GRD se divide el coste total del servicio de hospitalización por la actividad para calcular el coste por peso GRD. Como cada episodio de hospitalización tiene unos códigos de diagnóstico y procedimientos se puede calcular su peso GRD, lo que permite calcular su coste multiplicándolo por el coste del peso. El sistema GRD tiene en cuenta también las complicaciones quirúrgicas y médicas que hacen que el peso del episodio aumente. En la tabla 1 se muestran los costes de los procedimientos quirúrgicos en función del tipo de complicación.

**Cálculo de los costes unitarios de las quimioterapias.**

Para calcular el coste unitario de cada tipo de quimioterapia se han incluido los costes de la medicación, los costes de la preparación farmacéutica, los costes de uso del hospital de día, los costes de la consulta de control y las pruebas y el coste de estructura que se obtuvieron del sistema de contabilidad analítica. Los costes de la medicación proceden del sistema de contabilidad del servicio Vasco de Salud ya que son comunes para todos los hospitales y se han hecho para una superficie media de 1,8 m2. El coste unitario de la preparación en farmacia fue de 22,7 €, la estancia en el hospital de día de 89,1 € y el coste de estructura de 11,4 €. La administración de la capecitabina se lleva a cabo por el farmacéutico por lo que se imputó un tiempo de 0,5 horas en el primer ciclo y de 0,25 en el segundo. El coste anual real de un farmacéutico es de 59225 € y su jornada anual es de 1500 horas. En la tabla 2 aparece desagregado el cálculo de las diferentes quimioterapias.

**Cálculo del coste de seguimiento**

El coste del seguimiento fue de 450 euros por año para los estadíos I, II y III y su cálculo se muestra en la tabla 3. El coste de la colonoscopia fue de 281 euros y el del TAC de 163 euros.

**Análisis de supervivencia paramétrico**

El análisis de supervivencia es un conjunto de procedimientos estadísticos para el análisis de datos en los que la variable de resultado es el tiempo hasta que se produce un evento. El tiempo mide los años, meses, semanas o días desde el comienzo del seguimiento de un individuo hasta que se produce un evento o se cierra el seguimiento. Por evento se entiende la muerte, la incidencia de la enfermedad, la recaída a partir de la remisión, la recuperación (por ejemplo, volver a trabajo) o cualquier otro suceso de interés que puede suceder a un individuo. Requiere métodos de análisis específicos por dos razones fundamentales. Por un lado el seguimiento de los pacientes es frecuentemente incompleto ya que para que poder completar el estudio habría que esperar muchos años. Los sujetos que al cerrar el estudio no han alcanzado el evento de interés se denominan observaciones “censuradas” y deben considerarse como tales a la hora de analizarlas. Por otro lado, los pacientes no suelen entrar en el estudio al mismo tiempo. El análisis de los datos puede ser realizado utilizando técnicas paramétricas y no paramétricas [1]. En nuestro estudio hemos utilizado los métodos no paramétricos de Kaplan-Meier y como métodos paramétricos las distribuciones exponencial, gamma generalizada, log-logística de Weibull, Gompertz y Lognormal. El argumento principal para justificar el uso de los métodos paramétricos y no solamente los no paramétricos es la relevancia de calcular la supervivencia media en el análisis de supervivencia de los cánceres avanzados ya que solamente ellos permiten extrapolar la supervivencia más allá del seguimiento.

El método Kaplan-Meier analiza la supervivencia cada vez que un paciente muere. Para ello calcula la proporción acumulada que sobrevive para el tiempo de supervivencia individual de cada paciente y no se agrupan los tiempos de supervivencia en intervalos. Una vez calculada la probabilidad de supervivencia, ésta puede representarse gráficamente mediante la curva de Kaplan-Meier [9]. Un modelo de supervivencia paramétrica es aquél en el que tiempo de supervivencia sigue una distribución determinada y que puede no ser conocida a priori. Los ejemplos de las distribuciones que se utilizan comúnmente para el tiempo de supervivencia son: Weibull, Gompertz, exponencial, log-logística, lognormal y gamma generalizada. Son funciones que se diferencian por cómo cambia el riesgo (hazard) de que ocurra el evento a lo largo del tiempo y por incorporar variables predictoras para las cuales se calcula el Hazard Ratio (HR). En nuestro caso el evento de interés es la muerte de los pacientes y las variables predictoras son la duración, la edad y el sexo.

Como es habitual, en nuestro estudio el seguimiento de los pacientes no fue completo ya que no todos ellos fueron seguidos hasta la muerte. En consecuencia la supervivencia de los pacientes con CCR en estadio IV se trató como una variable censurada y para analizarla fueron utilizadas técnicas estadísticas del análisis de supervivencia de tipo paramétrico y no paramétrico [2,3]. Todo el análisis estadístico se llevó a cabo con el software STATA versión 13. En primer lugar se usó el método univariante de Kaplan-Meier para analizar la curva de supervivencia durante el seguimiento alcanzado.

La variable principal en la medida de resultados en oncología es la supervivencia media [2,3]. Sin embargo, su cálculo directo no es posible porque el seguimiento limitado de los pacientes determina el carácter de censurado o no completo de muchas de las observaciones. En consecuencia, la mayoría de los estudios utiliza el análisis de las medianas o métodos semiparamétricos como la regresión de Cox. Los últimos años han visto aparecer en la evaluación económica de los nuevos tratamientos oncológicos el uso de los métodos de supervivencia paramétricos para extrapolar la media de la supervivencia [2,3]. Al mismo tiempo y desde la perspectiva de la evaluación de los ensayos clínicos, Glick et al señalan que el indicador relevante es la media aritmética de la eficacia y para ello hay que calcular la supervivencia media [4]. Para calcular la supervivencia media se requirió extrapolar la esperanza de vida hasta la muerte de todos los pacientes y en consecuencia se aplicó el análisis de supervivencia paramétrico multivariante. A partir de los datos empíricos a nivel de paciente, se procedió a ajustar curvas paramétricas con diferentes distribuciones calculando los parámetros que las caracterizan. El tipo de función que mejor se adaptó a los datos fue seleccionado mediante el estadístico AIC (Akaike Criterio de Información). Siguiendo el algoritmo propuesto por Latimer [2] primero se comprobó la forma de la función de riesgo general y que las funciones de riesgo eran proporcionales para las categorías de las diferentes variables. Posteriormente, entre las diferentes funciones (Gompertz, Weibull, log-logística, log-normal y exponencial), se eligió la que mostró un AIC mínimo.

Referencias

1. Kleinbaum DG, Klein M. Survival Analysis: A Self Learning Text. Third edition. Springer Science. New York. 2012.

2. Latimer NR. Survival analysis for economic evaluations alongside clinical trials--extrapolation with patient-level data: inconsistencies, limitations, and a practical guide. Med Decis Making. 2013;33(6):743-54.

3. Tappenden P, Chilcott J, Ward S, Eggington S, Hind D, Hummel S. Methodological issues in the economic analysis of cancer treatments. Eur J Cancer. 2006;42(1):2867-2875.

4. Glick HA, Doshi JA, Sonnad SS, Polsky D. Economic evaluation in clinical trials. Oxford University Press. New York. 2007.

**Tabla1. Pesos GRD y costes de los episodios de hospitalización quirúrgica.**

|  | Sin complicación | | Con infección herida | |
| --- | --- | --- | --- | --- |
| Procedimiento quirúrgico | Peso GRD | Coste | Peso GRD | Coste |
| hemicolectomía dcha | 1,826 | 6.276 | 2,888 | 9.924 |
| hemicolectomía izda | 1,826 | 6.276 | 2,888 | 9.924 |
| sigmoidectomía | 1,826 | 6.276 | 2,888 | 9.924 |
| colectomia | 1,826 | 6.276 | 2,888 | 9.924 |
| escision local recto | 0,749 | 2.575 | 1,301 | 4.472 |
| reseccion anterior recto | 2,204 | 7.574 | 3,021 | 10.381 |
| reseccion anterior recto | 2,204 | 7.574 | 3,021 | 10.381 |
| amputacion abdomino-perineal | 2,204 | 7.574 | 3,021 | 10.381 |
| otra escision de colon | 1,826 | 6.276 | 2,888 | 9.924 |
| otra escision de recto | 2,204 | 7.574 | 3,021 | 10.381 |
|  | Con Absceso intraabdominal | | Con Neumonía | |
| Procedimiento quirúrgico | Peso GRD | Coste | Peso GRD | Coste |
| hemicolectomía dcha | 6,461 | 22.204 | 2,888 | 9.924 |
| hemicolectomía izda | 6,461 | 22.204 | 2,888 | 9.924 |
| sigmoidectomía | 6,461 | 22.204 | 2,888 | 9.924 |
| colectomia | 6,461 | 22.204 | 2,888 | 9.924 |
| escision local recto | 4,660 | 16.013 | 1,301 | 4.472 |
| reseccion anterior recto | 4,660 | 16.013 | 3,021 | 10.381 |
| reseccion anterior recto | 4,660 | 16.013 | 3,021 | 10.381 |
| amputacion abdomino-perineal | 4,660 | 16.013 | 3,021 | 10.381 |
| otra escision de colon | 6,461 | 22.204 | 2,888 | 9.924 |
| otra escision de recto | 4,660 | 16.013 | 3,021 | 10.381 |
|  | Con Infección urinaria | | Con Sepsis | |
| Procedimiento quirúrgico | Peso GRD | Coste | Peso GRD | Coste |
| hemicolectomía dcha | 2,888 | 9.924 | 6,461 | 22.204 |
| hemicolectomía izda | 2,888 | 9.924 | 6,461 | 22.204 |
| sigmoidectomía | 2,888 | 9.924 | 6,461 | 22.204 |
| colectomia | 2,888 | 9.924 | 6,461 | 22.204 |
| escision local recto | 1,301 | 4.472 | 4,660 | 16.013 |
| reseccion anterior recto | 3,021 | 10.381 | 4,660 | 16.013 |
| reseccion anterior recto | 3,021 | 10.381 | 4,660 | 16.013 |
| amputacion abdomino-perineal | 3,021 | 10.381 | 4,660 | 16.013 |
| otra escision de colon | 2,888 | 9.924 | 6,461 | 22.204 |
| otra escision de recto | 3,021 | 10.381 | 4,660 | 16.013 |

**Tabla 2. Coste unitario de las quimioterapias.**

| **Capecitabina** | **8 ciclos** |
| --- | --- |
| 2 semanas tto y 1 descanso | |
| tiempo farmacéutico ciclo 1 (horas) | 0,5 |
| tiempo farmacéutico ciclo 2 (horas) | 0,25 |
| coste hora farmacéutico | 39,5 |
| consultas oncólogo (8) | 688 |
| total farmacéutico | 88,8 |
| coste por tto | 262,08 |
| **Total coste** | **1038,9** |

| **XELOX** | Capecitabina-oxaliplatino | | | |  | |
| --- | --- | --- | --- | --- | --- | --- |
| Nº de ciclos **8** | **día 1** | **Capecitabina** | Nº de ciclos 8 | | | |
| Coste medicación | 23,4 | 2 semanas tto y 1 descanso | |  | |  |
| Coste preparación en farmacia | 22,7 | tiempo farmaceutico ciclo 1 (horas) | 0,5 |  | |  |
| Estancia en HDía Médico | 89,1 | tiempo farmaceutico ciclo 2 (horas) | 0,25 |  | |  |
| Consulta | 86,0 | coste hora farmaceutico | 39,5 |  | |  |
| Coste calculado | 221,2 | (59225euros /1500horas) | |  | |  |
| Coste estructura | 11,4 | total farmaceutico | 88,8 |  | |  |
| Sesion coste oxaliplatino | 232,6 | Total coste capecitabina | **321,8** |  | |  |
| Total coste oxaliplatino | 1.860,6 |  |  |  | |  |
| **Total coste Xelox** | **2.182,4** |  |  |  | |  |

| **FOLFOX** | Oxaliplatino-Folinico-Fluouracilo | | |  |
| --- | --- | --- | --- | --- |
|  | | Nº de ciclos | **12** |  |
|  | **día 1** | **día 2** | **ciclo** | **Tratamiento** |
| Coste medicación | 28,8 | 13,2 | 42,0 |  |
| Coste preparación en farmacia | 22,7 | 22,7 | 45,3 |  |
| Estancia en H. Día Médico | 89,1 | 89,1 | 178,2 |  |
| Consulta | 86,0 | 86,0 | 172,0 |  |
| **Coste calculado** | **226,6** | **211,0** | 437,5 |  |
| Coste estructura | 11,4 | 11,4 | 22,8 |  |
| **Total coste** | 238,0 | 222,4 | 460,3 | **5523,8** |

| **FOLFIRI** | Irinotecan-Folinico-Fluouracilo | |  |  |
| --- | --- | --- | --- | --- |
| Hipótesis: SC media para hombre: 1,8 m2 | | Nº de ciclos | **12** |  |
|  | **día 1** |  | **ciclo** | **Tratamiento** |
| Coste medicación | 41,9 |  |  |  |
| Coste preparación en farmacia | 22,7 |  |  |  |
| Estancia en HDía Médico | 89,1 |  |  |  |
| Consulta | 86,0 |  |  |  |
| **Coste calculado** | 239,6 |  |  |  |
| Coste estructura | 11,4 |  |  |  |
| **Total coste** | 251,0 |  | 251,0 | **3.012,3** |

| **Recto Adyuvancia** | **Fluouracilo** |  |
| --- | --- | --- |
|  | **FU** |  |
|  | **ciclos 1,2 5,6** | **ciclos 3,4** |
| Coste medicación | 92,9 | 10,78 |
| Coste preparación en farmacia | 113,4 | 22,7 |
| Estancia en HDía Médico | 445,6 | 89,1 |
| Consulta | 86,0 | 86,0 |
| **Coste calculado** | **737,8** | **208,6** |
| Coste estructura | 57,0 | 22,8 |
| **Total coste ciclo** | **794,8** | **231,3** |
| **Total coste 6 ciclos** | **3.642** |  |

| **Neo Adyuvancia recto** | Capecitabina-Fluouracilo | |  |  |
| --- | --- | --- | --- | --- |
| **Pre** | **FU** | **Capecitabina** |  |  |
|  | **2 ciclos** |  | **4 ciclos** |  |
| Coste medicación | 185,8 | 5 sem (5 días / sem) | 39 |  |
| Coste preparación en farmacia | 226,7 | tiempo farmaceutico ciclo 1 (horas) | 0,5 |  |
| Estancia en HDía Médico | 891,1 | tiempo farmaceutico ciclo 2 (horas) | 0,25 |  |
| Consulta | 172,0 | coste hora farmaceutico | 39,5 |  |
| Coste calculado | **1475,6** | (59225euros /1500horas) | |  |
| Coste estructura | 113,9 | total farmaceutico | 59,2 |  |
| **Total coste** | **1.589,5** |  | **98,2** | **3.277,2** |
|  |  |  |  |  |
| **Neo Adyuvancia recto** | Capecitabina-Fluouracilo | |  |  |
| **Post** | **FU** | **Capecitabina** |  |  |
|  | **4 ciclos** |  | **5 ciclos** |  |
| Coste medicación | 293,6 | 5 sem (5 días / sem) | 105,3 |  |
| Coste preparación en farmacia | 453,4 | tiempo farmaceutico ciclo 1 (horas) | 0,5 |  |
| Estancia en HDía Médico | 1782,2 | tiempo farmaceutico ciclo 2 (horas) | 0,25 |  |
| Consulta | 344,0 | coste hora farmaceutico | 39,5 |  |
| Coste calculado | **2873,2** | (59225euros /1500horas) | |  |
| Coste estructura | 227,8 | total farmaceutico | 98,7 |  |
| **Total coste** | **3.101,0** |  | **204,0** | **6.406,0** |
|  |  |  |  |  |
| **Total coste neo adyuvancia** | **9.683,2** |  |  |  |

|  |  |
| --- | --- |
| **Bevavizumab** | **sesión** |
| Coste medicación | 1023,0 |
| Coste preparación en farmacia | 22,7 |
| Estancia en HDía Médico | 89,1 |
| Consulta | 86,0 |
| **Coste calculado** | 1220,8 |
| Coste estructura | 11,4 |
| **Total coste** | 1232,2 |

| **FOLFIRI cetuximab** | Irinotecan-Folinico-Fluouracilo | | |
| --- | --- | --- | --- |
|  | |  |  |
|  | **sesión** |  |  |
| Coste medicación | 41,9 |  |  |
| Coste cetuximab | 1567,2 |  |  |
| Coste preparación en farmacia | 22,7 |  |  |
| Estancia en HDía Médico | 89,1 |  |  |
| Consulta | 86,0 |  |  |
| **Coste calculado** | **239,6** |  |  |
| Coste estructura | 11,4 |  |  |
| **Total coste** | **1.818,2** |  |  |

| **FOLFIRI panitumumab** | Irinotecan-Folinico-Fluouracilo | | |
| --- | --- | --- | --- |
|  | |  |  |
|  | **sesión** |  |  |
| Coste medicación folfiri | 41,9 |  |  |
| Coste panitumumab | 870,65 |  |  |
| Coste preparación en farmacia | 22,7 |  |  |
| Estancia en HDía Médico | 89,1 |  |  |
| Consulta | 86,0 |  |  |
| **Coste calculado** | **239,6** |  |  |
| Coste estructura | 11,4 |  |  |
| **Total coste** | **1.121,7** |  |  |

**Tabla 3. Costes del seguimiento de los estadios I, II y III.**

| **Recursos** | Año 1 | Año 2 | Año 3 | Año 4 | Año 5 | media |
| --- | --- | --- | --- | --- | --- | --- |
| Consultas sucesivas | 4 | 3 | 3 | 3 | 3 | **3,2** |
| TAC toraco-abdominal | 1 | 1 | 1 | 1 | 1 |  |
| Colonoscopia | 0 | 1 | 0 | 0 | 1 | **0,4** |
| **Costes CCR** | Año 1 | Año 2 | Año 3 | Año 4 | Año 5 | **Media** |
| **Seguimiento cánceres I-III** | 381 | 607,5 | 326,5 | 326,5 | 607,5 | **449,8** |
